# Supplementary material for: Transcriptomics reveals multiple resistance mechanisms against cotton leaf curl disease in a naturally immune cotton species, Gossypium arboreum
Source: PubMed Central journal article supplement (PMC5698292; doi:10.1038/s41598-017-15963-9), 2017-11-21
Supplement: 41598_2017_15963_MOESM1_ESM.pdf [file 41598_2017_15963_MOESM1_ESM.pdf]

1 **Supplementary information**

2

3 **Transcriptomics reveals multiple resistance mechanisms against**  
4 **cotton leaf curl disease in a naturally immune cotton species,**  
5 ***Gossypium arboreum***

6 Rubab Zahra Naqvi<sup>1,2,3†</sup>, Syed Shan-e-Ali Zaidi<sup>1,2,3,8†</sup> (ORCID 0000-0002-2976-4624), Khalid  
7 Pervaiz Akhtar<sup>4</sup>, Susan Strickler<sup>3</sup>, Melkamu Woldemariam<sup>3</sup>, Bharat Mishra<sup>5</sup>, M. Shahid  
8 Mukhtar<sup>5</sup>, Brian E. Scheffler<sup>6</sup>, Jodi A. Scheffler<sup>7</sup>, Georg Jander<sup>3</sup>, Lukas A. Mueller<sup>3</sup>, Muhammad  
9 Asif<sup>1</sup> and Shahid Mansoor<sup>1\*</sup>

10 <sup>1</sup>Agricultural Biotechnology Division, National Institute for Biotechnology and Genetic Engineering  
11 (NIBGE), Jhang Road, Faisalabad, Punjab, Pakistan

12 <sup>2</sup>Pakistan Institute of Engineering & Applied Sciences (PIEAS), Nilore, Islamabad, Pakistan

13 <sup>3</sup>Boyce Thompson Institute, 533 Tower Road, Cornell University, Ithaca, NY, USA

14 <sup>4</sup>Nuclear Institute for Agriculture & Biology (NIAB), Jhang Road, Faisalabad, Punjab, Pakistan

15 <sup>5</sup>Department of Biology, University of Alabama at Birmingham, Birmingham, AL, USA

16 <sup>6</sup>Genomics and Bioinformatics Research Unit Stoneville, MS, USA

17 <sup>7</sup>Crop Genetics Research Unit, United States Department of Agriculture-Agricultural Research Service  
18 (USDA-ARS), Stoneville, MS, USA

19 <sup>8</sup>Present address: AgroBioChem Department, Gembloux Agro-Bio Tech, University of Liège, 5030  
20 Gembloux, Belgium

21

22 †These authors contributed equally to this work.

23 **\*Correspondence:**

24 Shahid Mansoor

25 shahidmansoor7@gmail.com

26

## 27 **Supplementary Discussion**

### 28 **Validation of the transcriptome data by qRT-PCR**

29 Based on log<sub>2</sub>fold-change, p\_values and q\_values of RNA-Seq data, we selected a set of 17  
30 representative genes. We designed primers and performed qPCR on cDNA of independent  
31 biological replicates of *G. arboreum*. Our qPCR data strongly correlated with the RNA-Seq  
32 expression data (**Figure 4**). The detailed description of these genes and their possible  
33 involvement in plant defense response is elaborated below.

### 34 **Resistance gene analog**

35 In our RNA-Seq and qPCR data, we identified a putative disease resistance protein RGA3  
36 (Cotton\_A\_03097\_BGI-A2\_v1.0). RGAs are the candidate R-genes that have conserved motifs  
37 and domains and these have specific roles in plant resistance to diverse pathogens (Sekhwal et  
38 al., 2015). As a part of their effective innate immune system, plant genomes carry R-genes that  
39 function in pathogen recognition and defense response signal transduction. At present,  
40 several disease resistance *R* genes have been cloned from higher plants (Zipfel, 2008). Most  
41 dominant of these R-genes in monocots and dicots belong to NBS-LRR immune receptors. This  
42 class of R genes that have well conserved roles in higher plants that are to guard the plant cells  
43 against different bacterial, fungal and viral diseases (Song et al., 2003; Van Der Vossen et al.,  
44 2003; Chen et al., 2015). R gene-triggered resistance is associated with a rapid defense response  
45 known as hypersensitive response (HR) that can bring a localized cell death at the site of  
46 infection, relaying a series of downstream defense pathways (Thomma et al., 2011). R-genes  
47 have been found to be induced in response to several pathogens and diseases in plants, including  
48 tobacco mosaic virus rice blast, Arabidopsis downy mildew, tomato leaf mould and Verticillium  
49 wilt-resistance in cotton (Chen et al., 2015). The decreased levels of RGA in *G. arboreum*  
50 contrasts with the previous studies, and it might have a role in symptom development of CLCuD  
51 on cotton.

### 52 **Phytosulfokines**

53 Phytosulfokines 3 was among the well downregulated and qPCR validated genes in our dataset  
54 (Cotton\_A\_25246\_BGI-A2\_v1.0). In *Arabidopsis thaliana* phytosulfokines (PSKs) have been  
55 studied to be perceived by leucine-rich repeat receptor (LRR) kinases and involved in wounding,  
56 pathogens and elicitor responses (Loivamäki et al., 2010). PSKs also attenuate the pattern-  
57 triggered immunity (PTI) that is triggered by recognition of pathogen elicitors termed as  
58 microbe-associated molecular patterns (MAMPs). Even though, immune responses may provide  
59 good protection to plants from pathogens but the excessive immune responses may have a  
60 negative impact on plant growth and development. Thus, a good balance between positive and  
61 negative effects on the immune signaling network is important for plant fitness. PSK genes are  
62 therefore, involved in attenuation of PTI signaling in plants, however it stimulates plant growth

63 and development (Igarashi et al., 2012); (Wang et al., 2015b). Our results suggest that  
64 downregulation of PSK in *G. arboreum* has role in increasing the plant immunity to CLCuD.

### 65 **Boron transporter**

66 Boron is essential element and is required in a certain concentration for the growth and  
67 development of plant (Takano et al., 2002). We identified and validated the upregulation of  
68 Boron transporter 4 in *G. arboreum* (Cotton\_A\_28295\_BGI-A2\_v1.0). In *A. thaliana*, the boron  
69 transporter AtBOR1 is localized in the plasma membrane and regulates boron concentration in  
70 xylem tissues, to protect shoots from boron toxicity and necrosis (Takano et al., 2005). Boron  
71 transporter acts as a host factor to recognize the *Alternanthera mosaic virus* coat protein as an  
72 elicitor of systemic necrosis in *Nicotiana benthamiana*. This interaction of host boron transporter  
73 with viral coat protein regulates boron transport to induce necrosis at low temperatures, or that  
74 the interaction modulates MAP kinases based R gene response (Lim et al., 2014). Based on these  
75 studies the upregulation of boron transporter gene in *G. arboreum* depicts the protection of the  
76 plant from boron toxicity. Also in *G. arboreum* boron transporter may also be involved in host-  
77 viral interaction which further modulates the R-gene mediated response in host to combat virus  
78 infection.

### 79 **Nitrate reductase**

80 We identified and validated the upregulation of nitrate reductase [NADH] in CLCuD infected *G.*  
81 *arboreum* (Cotton\_A\_23939\_BGI-A2\_v1.0). Nitrate reductase (NR) has a role in plant pathogen  
82 interaction. It is one of the key enzymes producing nitric oxide (NO), that is involved in  
83 activating disease resistance in plants, and it is induced by fungal pathogen infection to in potato  
84 and tobacco (Yamamoto-Katou et al., 2006; Fagard et al., 2014). NR mutants of *A. thaliana*  
85 showed decreased arginine and nitrite levels, impaired nitric oxide synthesis and the  
86 hypersensitive response to bacteria pathogen *Pseudomonas syringae* (Modolo et al., 2006). The  
87 increased level of NR in *G. arboreum* may thus be associated with the NO mediated disease  
88 resistance and ultimately an immune response to CLCuV.

### 89 **Small heat shock protein**

90 A Small heat shock protein C2 (Cotton\_A\_29104\_BGI-A2\_v1.0) was upregulated in  
91 symptomatic *G. arboreum* plants. Induction and protein accumulation of small heat shock  
92 proteins in plants during several abiotic and biotic stresses shows the role of these proteins in  
93 stress tolerance (Sun et al., 2002). A microarray study revealed that defense related genes along  
94 with small heat shock genes are coordinately regulated in response to viruses including  
95 cucumber mosaic cucumovirus, oil seed rape tobamovirus, turnip vein clearing tobamovirus,  
96 potato virus X potexvirus, and turnip mosaic potyvirus viral infection (Whitham et al., 2003;  
97 Mandadi and Scholthof, 2013). The gene expression of heat shock proteins in plants is usually  
98 upregulated in response to environmental stresses like temperature, salt, light and microbial  
99 pathogens (Maimbo et al., 2007). However, genome-wide transcription analysis in *A. thaliana*

100 was done under the infestation of *E. coli* which lead to a downregulation of heat shock proteins.  
101 This absence of heat shock protein induction was correlated with the uptake and subsequent  
102 microbial digestion that helps plant in resources re allocation to remain competitive during stress  
103 (Paungfoo-Lonhienne et al., 2010). The downregulation of small heat shock protein in *G.*  
104 *arboreum* asymptomatic leaves during CLCuV infestation may indicates its role in viral  
105 degradation and helping plant to remain viable during this stress.

#### 106 ***ECERIFERUM1 (CER1)***

107 Aerial organs f land plants are covered by cuticle that is a hydrophobic layer or barrier to protect  
108 plants from ultraviolet radiation, desiccation and pathogens. Plant cuticle is mainly consisted of  
109 waxes that are long chain alkanes (Eigenbrode et al., 2000). *CER1* controls alkane biosynthesis  
110 and is so involved in plant defense responses to several biotic and abiotic stresses.

111 *Arabidopsis ECERIFERUM1 (CER1)* overexpression is associated with a dramatic increase in  
112 the production of the odd-carbon-numbered alkanes, with a substantial accumulation of iso-  
113 branched alkanes. Therefore, *CER1* overexpression in plants showed increased susceptibility to  
114 bacterial and fungal pathogens (Bourdenx et al., 2011).The upregulation of asymptomatic *G.*  
115 *arboreum ECERIFERUM1* indicates its involvement in plant pathogen interaction and  
116 resistance of plant to CLCuV.

#### 117 **bHLH transcription factor UNE10**

118 Transcription factor UNE10 belongs to the basic helix-loop-helix (bHLH) proteins superfamily.  
119 This family of transcription factors can bind to specific DNA target sites. Several bHLH proteins  
120 have been identified and well characterized *Arabidopsis* and rice and have shown important  
121 regulatory role in different biological processes including hormone signaling, anther and  
122 epidermal cell development, regulation of fruit dehiscence and stress responses (Feller et al.,  
123 2011). A recent study on genome-wide analysis of bHLH transcription factor in *Solanum*  
124 *lycopersicum* shows that bHLH transcription factors are involved in the plant defense under  
125 infection by tomato yellow leaf curl virus and upregulation of bHLH is associated with the  
126 disease resistance (Wang et al., 2015a). *G. arboreum* transcription factor UNE10 was up  
127 regulated during CLCuD stress suggest its role in disease resistance.

#### 128 **Potassium channel AKT2**

129 Potassium is an inorganic solute that is abundantly present in plants. Previous studies have  
130 shown that altering the potassium status reduces the viral diseases in plants. Potassium channels  
131 (AKT) respond to potassium levels in plants as well as other hormonal and environmental stimuli  
132 (Wang and Wu, 2010). Thus, alteration in the expression level of potassium channels is  
133 associated with viral disease resistance. Significantly enhanced soybean mosaic virus resistance  
134 was observed in soybean by the overexpression of GmAKT2 (Zhou et al., 2014). Thus, the  
135 upregulation of *G. arboreum* AKT2 gene might have a role in CLCuD tolerance.

### 136 **Defensin**

137 *G. arboreum* has showed a higher level of defensin gene expression against CLCuD. Plant  
138 defensins are essential components of host defense against pathogen resistance especially  
139 bacterial, fungal and insects (Thomma et al., 2002). Defensins are distributed consistently in  
140 leaves, flowers, seeds and therefore and is believed that such places are the first contact with a  
141 potential pathogens (Lacerda et al., 2014). The integral role of defensins is in the plant innate  
142 immune system and mostly plant defensins show an up regulation in their expression under  
143 abiotic as well as biotic stresses like injury and pathogen attack (De Beer and Vivier, 2011).

### 144 **Zinc metalloproteinase EGY3**

145 This protein belongs to matrix metalloproteinases (MMPs) which are a family of zinc-dependent  
146 endopeptidases. A few MMPs have been characterized in plants and are involved in plant  
147 growth, development and stress responses (Marino and Funk, 2012). Transcript levels increased  
148 have been shown to rapidly increase while interaction with pathogens in tobacco and *Medicago*  
149 *truncatula* under the infection of *Pseudomonas syringae* and *Sinorhizobium meliloti* respectively  
150 (Comber et al., 2007; Schiermeyer et al., 2009). The upregulation of this gene in *G. arboreum* is  
151 an indication of its contribution in plant defense response to pathogen.

### 152 **Vignain**

153 Vignain belongs to plant proteases that have been found to have function against pathogens by  
154 activation of the defense mechanism. An estimated 3% of the genome in *Arabidopsis* encodes  
155 proteases. Proteases are involved in processing the virulence effectors that are delivered by  
156 pathogens. This proteolytic processing further activates the basal defense mechanism (Xia,  
157 2004). It was studied that CDR1 gene in *Arabidopsis* encodes a protease that generates a mobile  
158 endogenous peptide elicitor to activate the basal defense mechanism. Studies have revealed that  
159 gene expression level of proteases are induced following pathogen infection in plants.  
160 *Arabidopsis* protease has been hypothesized to have a role in activating downstream immune  
161 signaling processes upon fungal attack (Figueiredo et al., 2014). The down regulation of vignain  
162 protease in *G. arboreum* might have its role in plant virus interaction.

163

### 164 **Transcription factor RADIALIS**

165 The RAD gene in plants encodes a single-repeat MYB transcription factors. The MYB gene  
166 family is ubiquitous in eukaryotes and are one of the richest groups of transcription factors in  
167 plants. Plant MYB proteins are characterized by a highly conserved MYB DNA-binding  
168 domain (Stevenson et al., 2006). MYB transcription factors act as master regulators of cellular  
169 responses and are involved in different plant development, secondary metabolism, hormone  
170 signal transduction, abiotic stress tolerance and disease resistance. These transcription factors  
171 have been studied to be involved in mechanisms of disease resistance in several plants through

172 regulating defense genes(Katiyar et al., 2012). Knockdown of a MYB gene in Arabidopsis  
173 enhanced its susceptibility to white cabbage butterfly (*Pieris rapae*)(De Vos et al., 2006). In  
174 tobacco, overexpressing a wheat MYB gene showed significantly enhanced resistance to the  
175 pathogen *Ralstonia solanacearum*, and transgenic plants were also having increased tolerance to  
176 salt and drought stresses (Liu et al., 2011a). According to another study MYB transcription  
177 factors play important role in plant metabolism and photosynthesis (Saibo et al., 2009). Plants  
178 reallocate its energy from photosynthesis during responses to pathogen stress (Yuan et al., 2005).  
179 Decreased metabolic activity has observed along with downregulation of MYB in rice under  
180 brown planthopper infection (Wang et al., 2012). Therefore, the downregulation of *G. arboreum*  
181 MYB in our experiment may indicate the activation of other stress responsive genes and  
182 reallocation of plant energy to prevent further damage related to loss of water and nutrients.

### 183 **Bidirectional sugar transporter SWEET17**

184 SWEETs are bidirectional vacuolar fructose transporters in plants predicted to be involved in  
185 maintaining sugar homeostasis in plant organs during favorable and under abiotic and biotic  
186 stressed conditions. SWEET transporters have been found to be associated with plant pathogen  
187 interactions during a pathogen attack in plants (Chandran, 2015). Pathogens mainly infect plant  
188 cells to fuel their own growth and reproduction by acquiring plant nutrients, especially sugars  
189 that often damages the plant productivity (Chakraborty and Newton, 2011). Studies in rice have  
190 revealed that bacterial pathogens like bacterial blight disease causing *Xanthomonas* species  
191 mainly co-opt with plant SWEET transporters to access host sugar reservoirs (Antony et al.,  
192 2010; Liu et al., 2011b). These bacteria use their type III secretion system to secrete  
193 transcription-activator like (TAL) effectors to target the expression of certain *SWEET* genes  
194 (Bogdanove, 2014). This targeted induction of SWEETs appears to be required for pathogen  
195 growth as lack of induction, in most cases, results in reduced pathogen growth and disease  
196 resistance. A Reduced level of *SWEET* gene expression in tobacco and rice have showed  
197 enhanced resistance to pathogen, suggesting its role in pathogen growth and plant disease  
198 resistance (Antony et al., 2010; Chandran, 2015). The downregulation of *G. arboreum* SWEET  
199 transporter suggests its role in sugar homeostasis in unfavorable conditions and possible  
200 involvement in reduced pathogen growth and disease resistance.

### 201 **Chaperone protein DnaJ**

202 DnaJ also known HSP40 or J-domain-containing protein or J-protein is a co-chaperone and  
203 component of the HSP70 chaperone machinery. HSP40 has a conserved 70 amino acid J-domain  
204 that interacts with nucleotide-binding domain of HSP70 to increase its affinity for substrates or  
205 clients (Kampinga and Craig, 2010). DnaJ chaperons are reported to play an important role in  
206 virus-plant interaction and viral pathogenesis particularly in viral movement. It interacts with  
207 viral coat or movement protein that as a cascade binds to viral nucleic. This binding of chaperone  
208 with viral nucleic acid or virion facilitates the viral movement from cytosol to membrane or  
209 plasmodesmata between two cells, which leads to a rapid and severe symptom development in

210 the plant (Chen et al., 2008; Verchot, 2012). The coat protein of *Potato virus Y* interacts with  
211 DnaJ-like protein that is important for cell-to-cell viral movement (Hofius et al., 2007).  
212 Similarly, the interaction of movement protein of *Tomato spotted wilt virus* with DnaJ-like  
213 protein has been studied in tomato (Soellick et al., 2000). DnaJ has been found to have a role in  
214 regulation of plant immunity by interaction with HSP70 for example its silencing in soybean  
215 enhanced the susceptibility to *Soybean mosaic virus* (Liu and Whitham, 2013);(Park and Seo,  
216 2015). Hence its upregulation in *G. arboreum* symptomatic plants under CLCuD stress directs its  
217 role in helping viral cell to cell movement in plant and making plant susceptible to establish  
218 symptoms by graft inoculation of CLCuV.

### 219 **Aquaporin PIP2**

220 Plant aquaporins also termed as water channel proteins are integral regulator of plant water  
221 relations (Afzal et al., 2016; Meng et al., 2016). They have essential role in plant growth and  
222 development and involve in plant stress responses against various environmental stresses that  
223 disturb plant cell nutrient homeostasis and osmotic balance (Matsumoto et al., 2009). During  
224 biotic stresses like pathogen infection, plant produces reactive oxygen species as a player of  
225 plant immune system. Aquaporin homologs have been highlighted to have a role in plant defense  
226 by transporting H<sub>2</sub>O<sub>2</sub> during pathogen attack (Tian et al., 2016). In a comparative study of citrus  
227 susceptible and tolerant plants to proteobacterium, *Candidatus Liberibacter*, under pathogen  
228 infestation, six aquaporin genes were found to be differentially expressed and were correlated  
229 to disease development (Aritua et al., 2013). The induction of 24 aquaporin genes have been  
230 reported on expression profiling of soybean under *Pseudomonas syringae* infection (Zou et  
231 al., 2005). The role of aquaporins in response to pathogen infection has also been observed  
232 in tobacco and grasses against nematode and herbivores (Opperman et al., 1994; Hartley et al.,  
233 2015). Studies have shown the involvement of aquaporins in plant-viral interactions, for  
234 example aquaporin genes interact with a cucumber mosaic virus (CMV) replication protein  
235 that potentially affects CMV replication in the host plant (Kim et al., 2006). The upregulation  
236 of *G. arboreum* aquaporin might reveals its role in plant-virus interaction and disease  
237 development.

### 238 **Protein REVEILLE**

239 REVEILLE is a plant Myb-like transcription factor for the integration of circadian clock and  
240 hormone signaling. REVEILLE connects the important networks that provides a synchronization  
241 of plant growth with changing rhythms of environment (Rawat et al., 2009). The circadian clock  
242 regulation modulates plant growth and development and has often been implicated in response to  
243 environmental stresses. In *Arabidopsis*, REVEILLE has been studied to have a role in regulation  
244 of necrotrophic fungus and freezing tolerance (Cerrudo et al., 2012; Meissner et al., 2013). The  
245 upregulation of *G. arboreum* REVEILLE gene might have a role in plant protection by  
246 coordination of plant growth with rhythmic changes in the environment during CLCuV stress.

247 **60S ribosomal protein L39**

248 Ribosomes are highly conserved in nature and required for integral cellular activities including  
249 cell growth, development and gene regulation. Ribosome is composed of two subunits, four  
250 ribosomal RNAs, and 82 associated ribosomal proteins (Barakat et al., 2001; Rogalski et al.,  
251 2008). Ribosomal proteins have been reported to have a role in basal resistance against virulent  
252 pathogens both in humans and plants (Zhou et al., 2013; Nagaraj et al., 2016) . Recently, studies  
253 have shown the correlation of overexpressed ribosomal protein L3 with antiviral and anti-fungal  
254 defense in tobacco. Another study has shown that ribosomal protein L12 and L19 are important  
255 in nonhost disease resistance in *N. benthamiana* and *A. thaliana* (Di and Tumer, 2005). A study  
256 in *G. arboreum* revealed that upregulation of ribosomal protein L18 mediates resistance to  
257 Verticillium wilt by inducing salicylic acid signaling pathway (Gong et al., 2017). So,  
258 overexpression of ribosomal protein L39 in our experiment might have a role in inducing  
259 pathways involved in *G. arboreum* resistance to CLCuD.



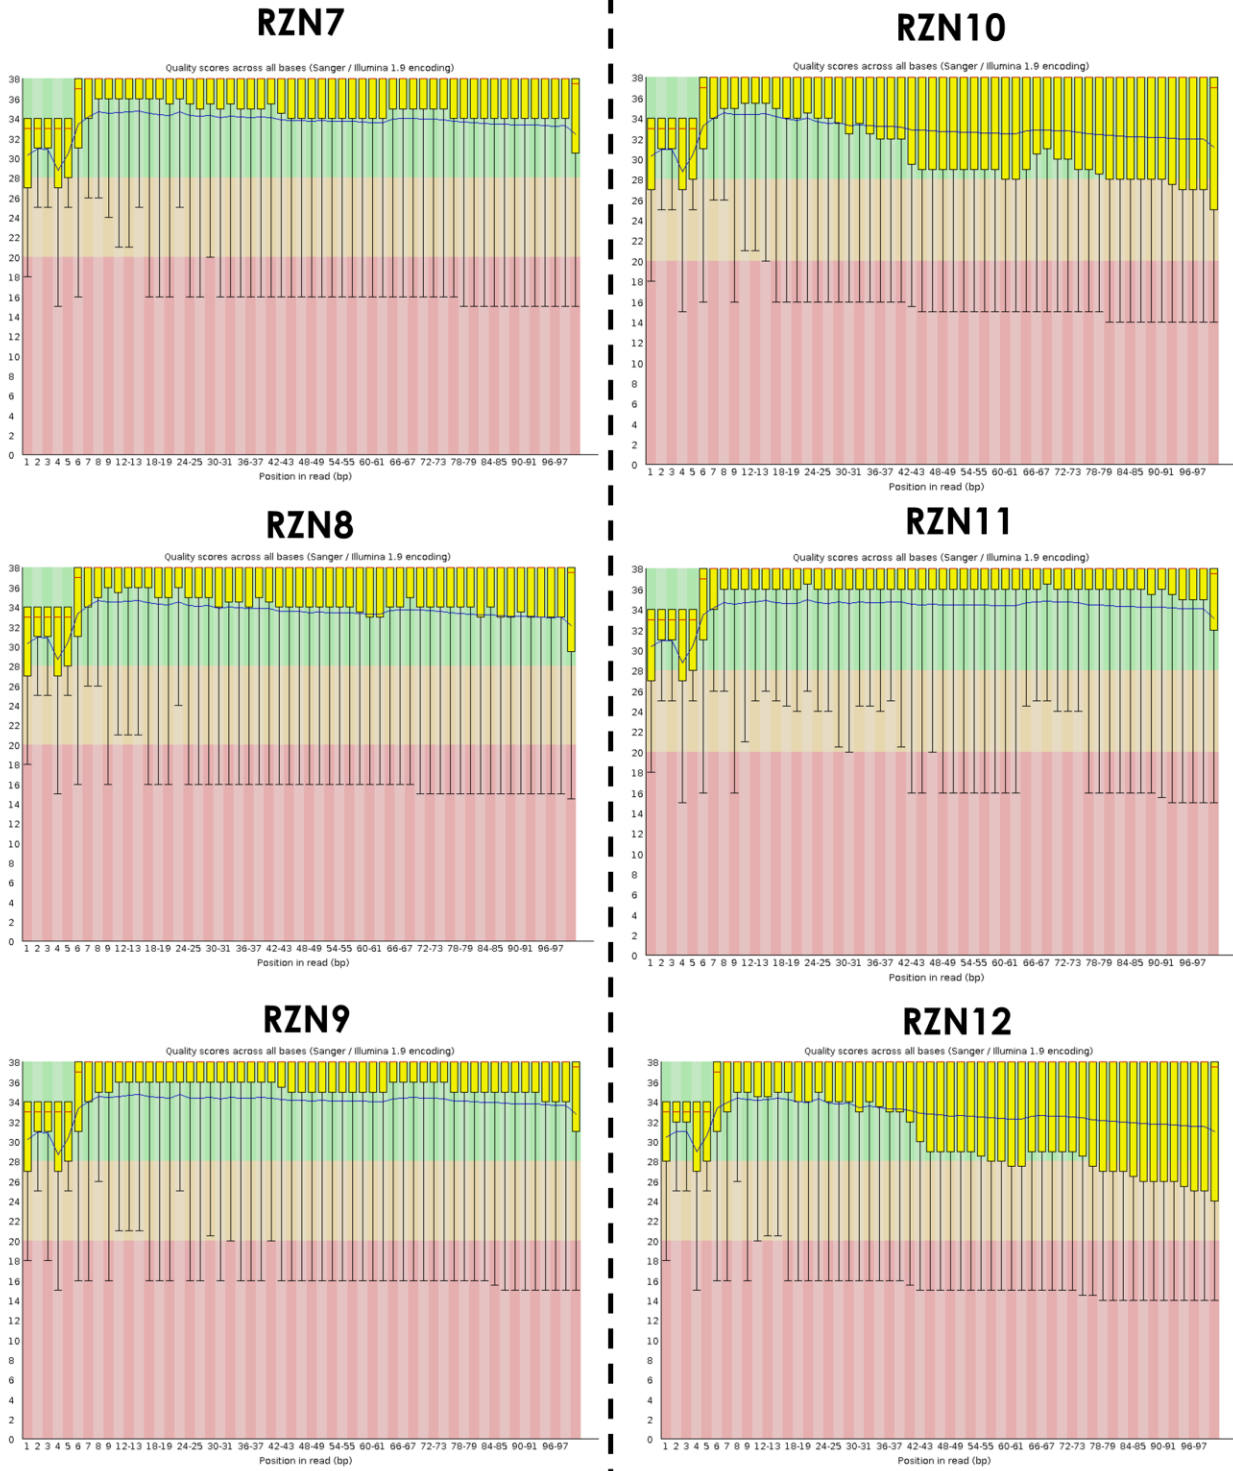

260

261 **Figure S1:** Quality assessment of trimmed FASTQ sequence data

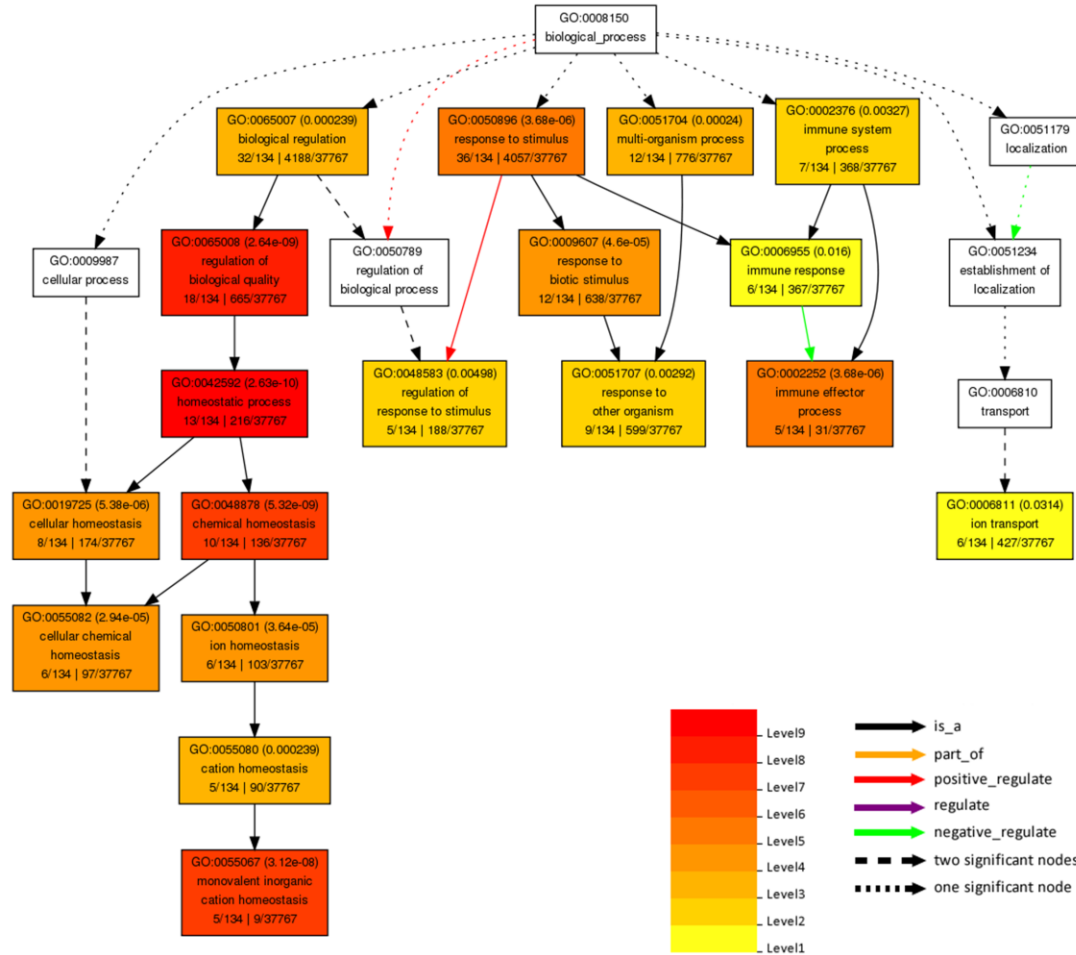

262

263 **Figure S2:** Interactive graph of GO terms associated with cotton leaf curl disease responsive *G. arboreum* differentially expressed  
 264 genes (top 100). Analysis performed with online tool agriGO (bioinfo.cau.edu.cn/agriGO/) where a key at bottom indicates  
 265 significance levels of GO terms.

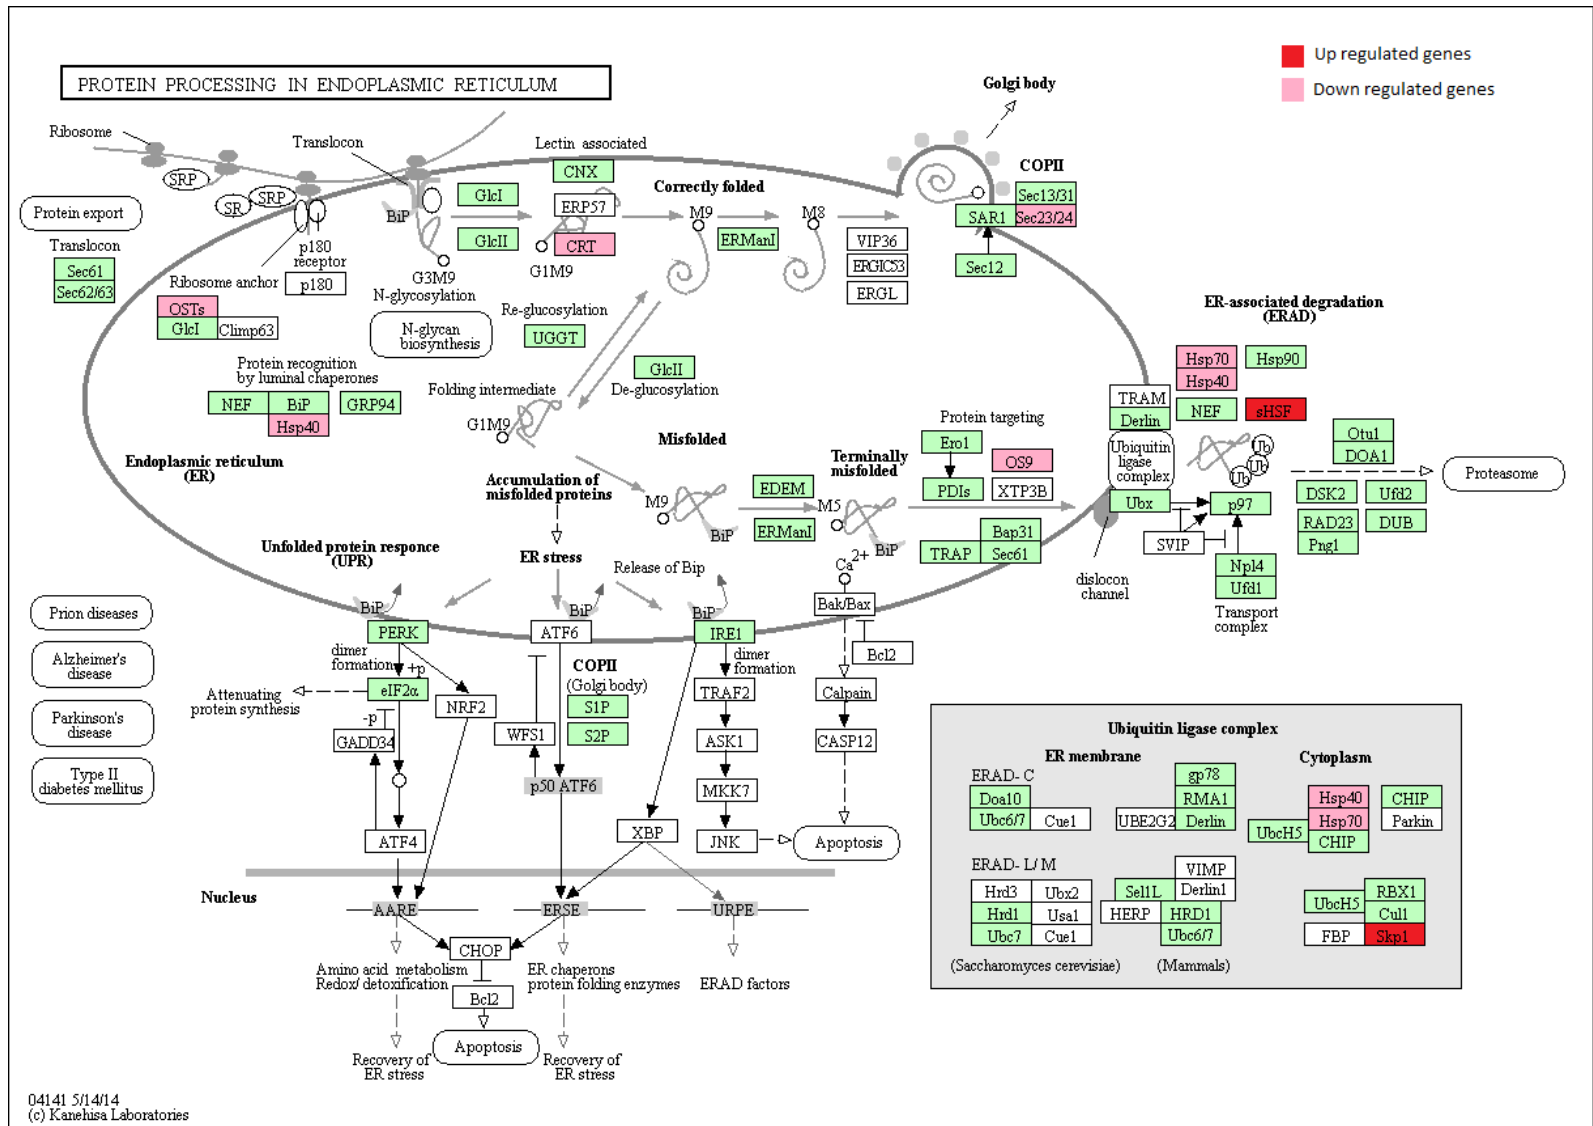

266

267 **Figure S3:** KEGG pathway associated with ubiquitin mediated proteolysis. Pathway analysis was performed using KEGG (Kanehisa  
268 et al., 2017: [www.kegg.jp/kegg/kegg1.html](http://www.kegg.jp/kegg/kegg1.html)) and Kobas 3.0.

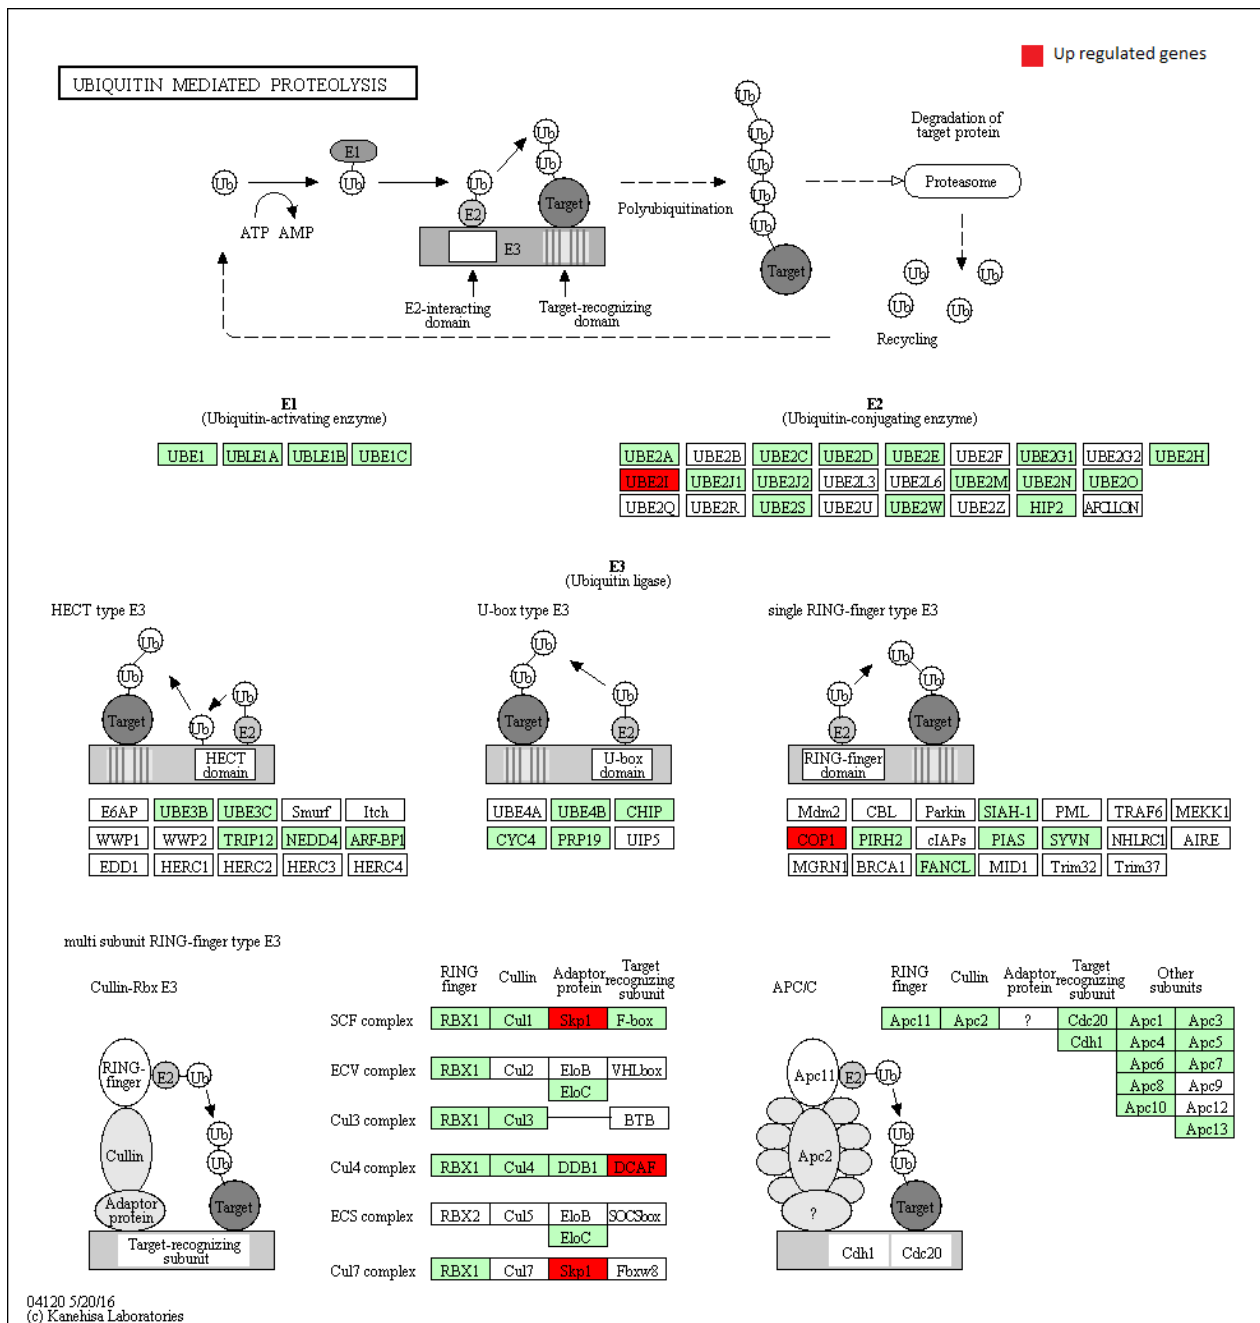

269

270 **Figure S4:** KEGG pathway associated with protein processing in endoplasmic reticulum.

271 Pathway analysis was performed using KEGG (Kanehisa et al., 2017:

272 [www.kegg.jp/kegg/kegg1.html](http://www.kegg.jp/kegg/kegg1.html)) and Kobas 3.0.

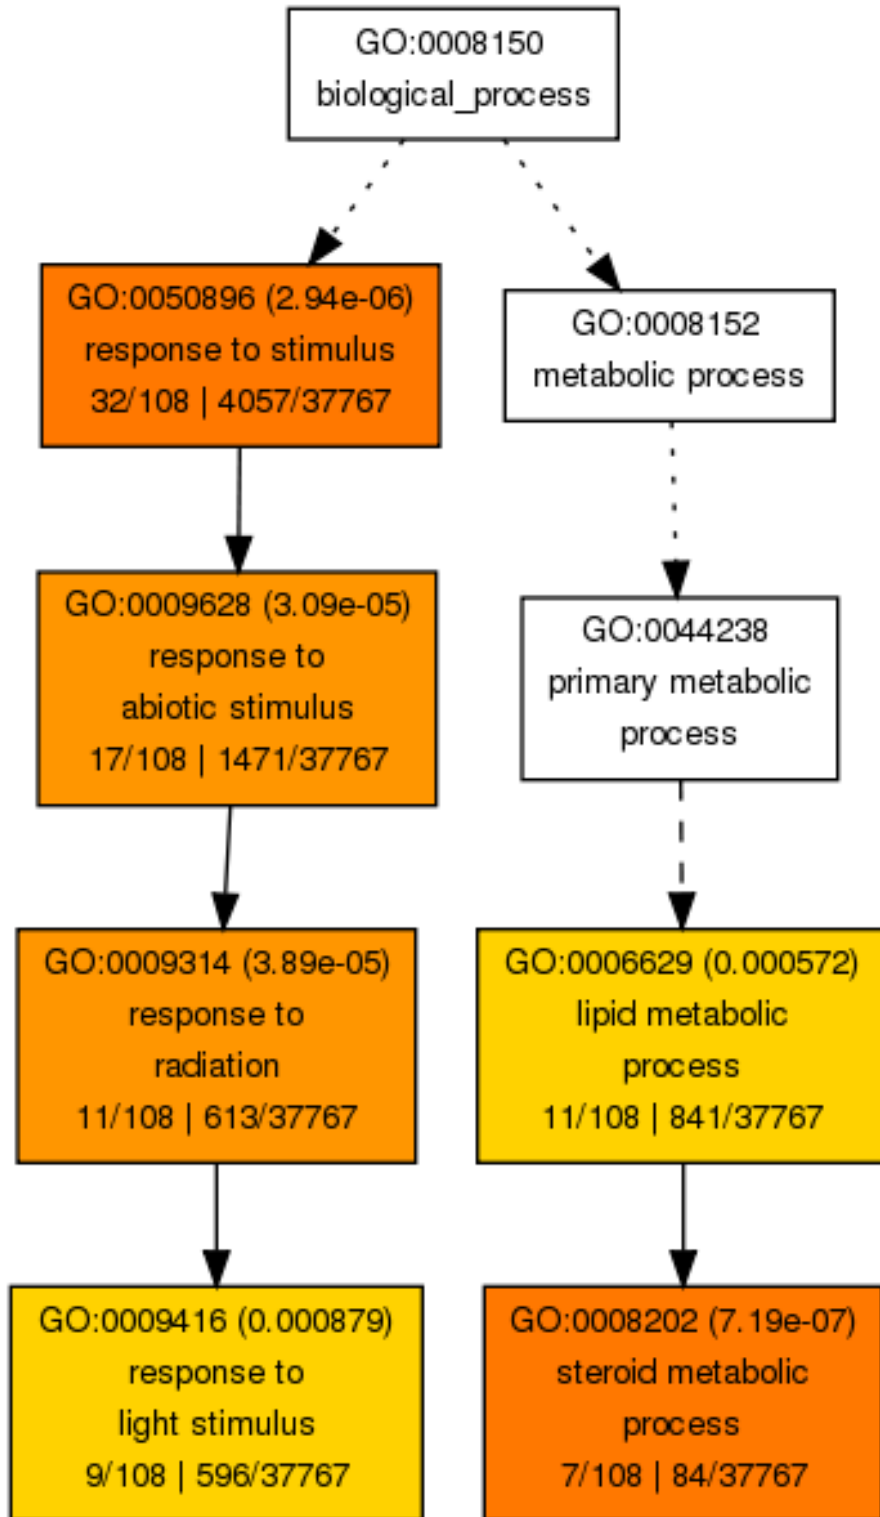

273

274 **Figure S5:** Interactive graph of GO terms associated with blue module identified by co-  
 275 expression network analysis. GO term analysis performed with online tool agriGO  
 276 (bioinfo.cau.edu.cn/agriGO/).

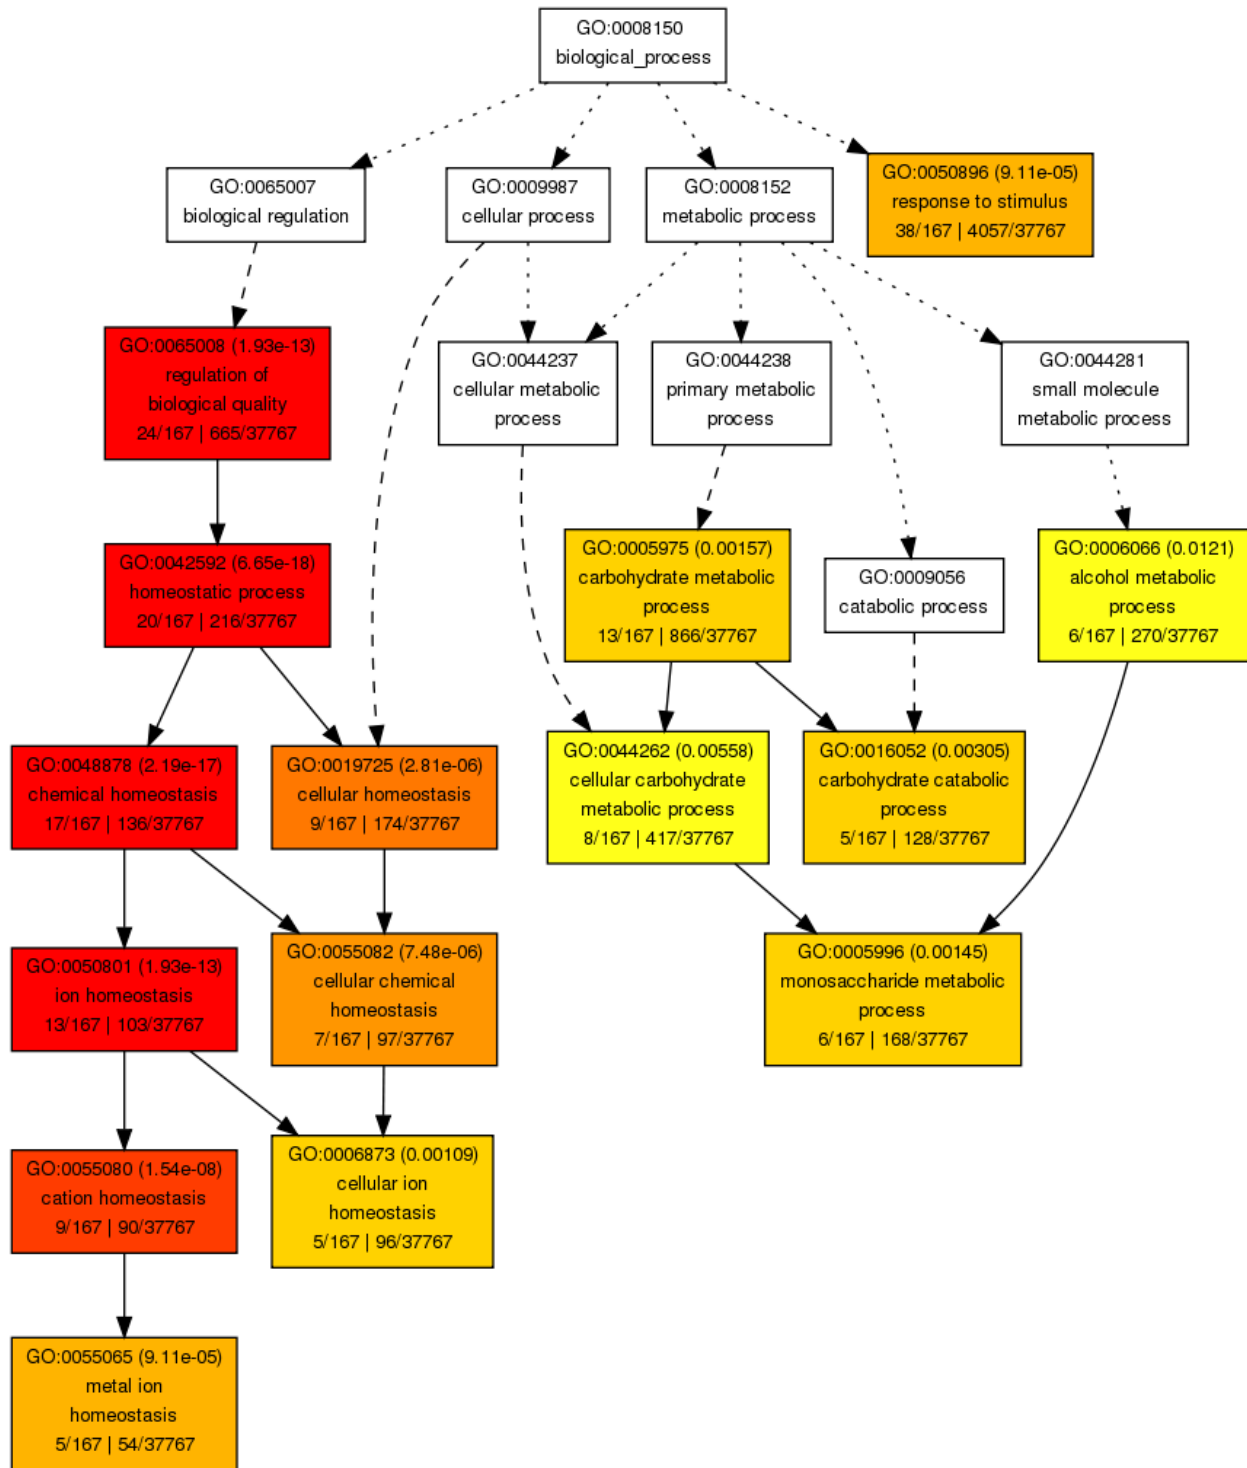

277

278 **Figure S6:** Interactive graph of GO terms associated with turquoise module identified by co-  
 279 expression network analysis. GO term analysis performed with online tool agriGO  
 280 (bioinfo.cau.edu.cn/agriGO/).

281

282 **Table S1:** Features of reference *Gossypium arboreum* genome obtained from  
283 <https://www.cottongen.org/node/1300251>

|                                         |                                                                                             |
|-----------------------------------------|---------------------------------------------------------------------------------------------|
| Analysis Name                           | Gossypium arboreum (A2) Genome BGI Assembly v2.0 & Annotation v1.0                          |
| Method                                  | SOAPdenovo                                                                                  |
| Source                                  | Illumina HiSeq 2000 reads from various insert size libraries ( <i>G. arboreum</i> A genome) |
| Date performed                          | 2014-05-31                                                                                  |
| Number of pseudomolecules (chromosomes) | 13                                                                                          |
| Total scaffolds ( $\geq 2$ kb)          | 7,914                                                                                       |
| Number of Gene models                   | 41,330                                                                                      |
| Number of miRNA                         | 431                                                                                         |
| Number of rRNA                          | 10,464                                                                                      |
| Number of tRNA                          | 2,289                                                                                       |
| Number of snRNA                         | 7,619                                                                                       |

284

285

286 **Table S3:** qRT-PCR primers for RNA Seq Data validation

| <b>Primer Sequence</b>     | <b>Gene_ID</b>             |
|----------------------------|----------------------------|
| GGAAAGCGAAACAGCAAGAC       | Cotton_A_29104_BGI-A2_v1.0 |
| ATTTGGGAGGTGCAGAACAC       |                            |
| CACTTTTCATAGCTGCGCTTC      | Cotton_A_25246_BGI-A2_v1.0 |
| ACATGAGCAGCAAGGGTTCT       |                            |
| TTCCCGGTAATCAGTTCTGG       | Cotton_A_28295_BGI-A2_v1.0 |
| GAAGAAGGGCAATGGAAACA       |                            |
| ATCTATCATCTCCGCGTTGG       | Cotton_A_34570_BGI-A2_v1.0 |
| GGAATCGGTTCTTTCAACA        |                            |
| AGAACCCATTGCACATAGC        | Cotton_A_00757_BGI-A2_v1.0 |
| CTTTGTGCAGCAAGGCATAA       |                            |
| GTGGTGGAGGGCAGAATATG       | Cotton_A_17591_BGI-A2_v1.0 |
| CAGTTCCTAGTACAGAAGCAACG    |                            |
| GTTTCCGGTTACCCTGGTTT       | Cotton_A_23939_BGI-A2_v1.0 |
| CTTCAGACCCTTCGAAGCAC       |                            |
| GCCCCGTCGAGTTATTTGTA       | Cotton_A_00108_BGI-A2_v1.0 |
| GTTGGGATTCCCCGTTCTAT       |                            |
| AAGAAAAGGGCGGATAGGAA       | Cotton_A_00151_BGI-A2_v1.0 |
| CCAATGAAAATCCCACCATC       |                            |
| AGGAAACCAAGGTTGCAATG       | Cotton_A_22786_BGI-A2_v1.0 |
| AGCAATGCTTCTTCGTCGTT       |                            |
| GAGATTGAGGATTGCGGAAA       | Cotton_A_03097_BGI-A2_v1.0 |
| CAACCTTTTGGATGTGAGCA       |                            |
| AGGTTTCATGGACAGCCAAAC      | Cotton_A_19720_BGI-A2_v1.0 |
| CAGCCACAAGCAGCTCATAG       |                            |
| ACGTTTTGGCACATCGTACA       | Cotton_A_40086_BGI-A2_v1.0 |
| TGGGAGGTGCAAAGATTAGG       |                            |
| GGACTGGGTGCTGAGATCAT       | Cotton_A_07057_BGI-A2_v1.0 |
| GACAGCAGCTCCAAAACCTCC      |                            |
| ATGAGGCAGAACAGGCCTATCCC    | Cotton_A_11914_BGI-A2_v1.0 |
| TTAGAACCCTAGCTTGGTACGGCGCC |                            |
| AAATCCGGTTTGTGCTGTTC       | Cotton_A_01472_BGI-A2_v1.0 |
| CAGCAGTTTTTCGTGCCTACA      |                            |
| CGGCTACCACATCCAAGGAA       | 18S-internal control       |
| TGTCACTACCTCCCCGTGTCA      |                            |



287 **Table S4:** Selected differentially expressed genes for qRT-PCR and their differential gene expression

| gene_id                    | locus                                  | value_1 | value_2 | log2FC   | p_value  | q_value  |
|----------------------------|----------------------------------------|---------|---------|----------|----------|----------|
| Cotton_A_00108_BGI-A2_v1.0 | gnl BGIA2 CA_chr7:38191739-38194551    | 117.789 | 1.52922 | -6.26727 | 0.00135  | 0.032047 |
| Cotton_A_00151_BGI-A2_v1.0 | gnl BGIA2 CA_chr7:38612815-38616206    | 2.78665 | 65.9097 | 4.56389  | 0.00075  | 0.021628 |
| Cotton_A_00757_BGI-A2_v1.0 | gnl BGIA2 CA_chr5:7603021-7605571      | 5.23619 | 80.8297 | 3.9483   | 5.00E-05 | 0.004237 |
| Cotton_A_01472_BGI-A2_v1.0 | gnl BGIA2 CA_chr6:119691944-119694178  | 7.74226 | 149.129 | 4.26767  | 5.00E-05 | 0.004237 |
| Cotton_A_03097_BGI-A2_v1.0 | gnl BGIA2 CA_chr13:82654606-82654846   | 64.3806 | 0       | -inf     | 0.0008   | 0.022474 |
| Cotton_A_07057_BGI-A2_v1.0 | gnl BGIA2 CA_chr10:88062721-88063889   | 4.47933 | 98.8612 | 4.46405  | 0.0006   | 0.018406 |
| Cotton_A_11914_BGI-A2_v1.0 | gnl BGIA2 CA_chr3:22049760-22050000    | 0       | 951.119 | inf      | 5.00E-05 | 0.004237 |
| Cotton_A_17591_BGI-A2_v1.0 | gnl BGIA2 CA_chr12:46317685-46317841   | 0       | 191.039 | inf      | 0.0003   | 0.012406 |
| Cotton_A_19720_BGI-A2_v1.0 | gnl BGIA2 CA_chr13:63435527-63435770   | 89.0602 | 0       | -inf     | 0.0001   | 0.006735 |
| Cotton_A_22786_BGI-A2_v1.0 | gnl BGIA2 CA_chr7:70420912-70422075    | 239.853 | 3.24601 | -6.20734 | 0.00105  | 0.026869 |
| Cotton_A_23939_BGI-A2_v1.0 | gnl BGIA2 CA_chr12:71717597-71721346   | 5.1819  | 293.628 | 5.82437  | 5.00E-05 | 0.004237 |
| Cotton_A_25246_BGI-A2_v1.0 | gnl BGIA2 CA_chr8:94985683-94986012    | 92.5924 | 0       | -inf     | 0.0008   | 0.022474 |
| Cotton_A_28295_BGI-A2_v1.0 | gnl BGIA2 CA_chr8:55796825-55800269    | 7.49608 | 129.614 | 4.11194  | 5.00E-05 | 0.004237 |
| Cotton_A_29104_BGI-A2_v1.0 | gnl BGIA2 CA_chr11:102055257-102058107 | 636.537 | 4.89619 | -7.02244 | 0.0011   | 0.027568 |
| Cotton_A_34570_BGI-A2_v1.0 | gnl BGIA2 CA_chr8:72452913-72458132    | 8.78946 | 138.661 | 3.97964  | 5.00E-05 | 0.004237 |
| Cotton_A_40086_BGI-A2_v1.0 | gnl BGIA2 CA_chr13:134161414-134162613 | 143.501 | 0       | -inf     | 5.00E-05 | 0.004237 |
| Cotton_A_19100_BGI-A2_v1.0 | gnl BGIA2 CA_chr1:82884357-82886990    | 4.54332 | 83.986  | 4.20833  | 5.00E-05 | 0.004237 |

288 **Table S5:** Differential gene expression of Ethylene\_response-genes in the transcriptomic data of *G. arboreum* under CLCuD infection

| gene_id                    | locus                                | value_1 | value_2 | log2FC   | p_value  | q_value  |
|----------------------------|--------------------------------------|---------|---------|----------|----------|----------|
| Cotton_A_00151_BGI-A2_v1.0 | gnl BGIA2 CA_chr7:38612815-38616206  | 2.78665 | 65.9097 | 4.56389  | 0.00075  | 0.021628 |
| Cotton_A_01965_BGI-A2_v1.0 | gnl BGIA2 CA_chr6:29174682-29175480  | 317.831 | 56.8102 | -2.48404 | 5.00E-05 | 0.004237 |
| Cotton_A_04648_BGI-A2_v1.0 | gnl BGIA2 CA_chr10:19937964-19939419 | 55.7139 | 322.799 | 2.53453  | 5.00E-05 | 0.004237 |
| Cotton_A_11306_BGI-A2_v1.0 | gnl BGIA2 CA_chr10:19167132-19167714 | 17.3996 | 0       | _inf     | 5.00E-05 | 0.004237 |
| Cotton_A_18053_BGI-A2_v1.0 | gnl BGIA2 CA_chr11:33845449-33846740 | 15.5048 | 201.836 | 3.70239  | 0.0004   | 0.01451  |
| Cotton_A_22458_BGI-A2_v1.0 | gnl BGIA2 CA_chr5:25024119-25024779  | 155.197 | 31.3229 | -2.30881 | 5.00E-05 | 0.004237 |
| Cotton_A_38436_BGI-A2_v1.0 | gnl BGIA2 CA_chr8:11447924-11448518  | 5.7767  | 0       | _inf     | 0.0008   | 0.022474 |

289

290

291 **Table S6:** Differential gene expression of R genes in the transcriptomic data of *G. arboreum* under CLCuD infection

| gene_id                    | locus                                 | value_1 | value_2 | log2FC   | p_value  | q_value  |
|----------------------------|---------------------------------------|---------|---------|----------|----------|----------|
| Cotton_A_00075_BGI-A2_v1.0 | gnl BGIA2 CA_chr7:37858904-37861479   | 12.0667 | 2.29477 | -2.39461 | 0.00235  | 0.046765 |
| Cotton_A_01444_BGI-A2_v1.0 | gnl BGIA2 CA_chr6:119940486-119941236 | 0       | 8.21728 | inf      | 5.00E-05 | 0.004237 |
| Cotton_A_03097_BGI-A2_v1.0 | gnl BGIA2 CA_chr13:82654606-82654846  | 64.3806 | 0       | _inf     | 0.0008   | 0.022474 |
| Cotton_A_07954_BGI-A2_v1.0 | gnl BGIA2 CA_chr6:50014751-50017049   | 73.5349 | 24.133  | -1.60742 | 0.0019   | 0.041007 |
| Cotton_A_13407_BGI-A2_v1.0 | gnl BGIA2 CA_chr6:99993742-99996355   | 6.92684 | 25.4078 | 1.875    | 0.0022   | 0.044639 |
| Cotton_A_19774_BGI-A2_v1.0 | gnl BGIA2 CA_chr11:35453737-35456746  | 16.0415 | 2.81418 | -2.51102 | 0.00025  | 0.011261 |
| Cotton_A_21491_BGI-A2_v1.0 | gnl BGIA2 CA_chr4:9410699-9418467     | 0       | 4.41402 | inf      | 5.00E-05 | 0.004237 |
| Cotton_A_27521_BGI-A2_v1.0 | gnl BGIA2 CA_chr8:73311906-73312434   | 7.61972 | 0       | _inf     | 0.0004   | 0.01451  |
| Cotton_A_30374_BGI-A2_v1.0 | gnl BGIA2 CA_chr2:16168065-16168743   | 0       | 5.81196 | inf      | 0.0001   | 0.006735 |
| Cotton_A_33351_BGI-A2_v1.0 | gnl BGIA2 CA_chr4:79293587-79294172   | 0       | 8.4326  | inf      | 0.0004   | 0.01451  |
| Cotton_A_34256_BGI-A2_v1.0 | gnl BGIA2 CA_chr4:120630533-120630977 | 0       | 11.9953 | inf      | 0.00085  | 0.023527 |

292

293

294 **Table S7:** Differential gene expression of kinase genes in the transcriptomic data of *G. arboreum* under CLCuD infection

| gene_id                    | locus                                 | value_1 | value_2 | log2FC   | p_value  | q_value  |
|----------------------------|---------------------------------------|---------|---------|----------|----------|----------|
| Cotton_A_00489_BGI-A2_v1.0 | gnl BGIA2 CA_chr2:68657365-68662624   | 23.4456 | 7.33695 | -1.67606 | 0.00205  | 0.042988 |
| Cotton_A_01042_BGI-A2_v1.0 | gnl BGIA2 CA_chr13:75050666-75055909  | 63.0786 | 17.6709 | -1.83577 | 0.0001   | 0.006735 |
| Cotton_A_01175_BGI-A2_v1.0 | gnl BGIA2 CA_chr4:33406606-33407959   | 4.40997 | 24.712  | 2.48637  | 0.0022   | 0.044639 |
| Cotton_A_01427_BGI-A2_v1.0 | gnl BGIA2 CA_chr6:120105721-120107697 | 157.439 | 40.4777 | -1.95959 | 0.00045  | 0.015611 |
| Cotton_A_02476_BGI-A2_v1.0 | gnl BGIA2 CA_chr11:21025139-21026831  | 54.1352 | 12.1407 | -2.15672 | 0.00055  | 0.017388 |
| Cotton_A_06203_BGI-A2_v1.0 | gnl BGIA2 CA_chr6:68944361-68947654   | 46.7306 | 12.9512 | -1.85128 | 0.0014   | 0.032969 |
| Cotton_A_06973_BGI-A2_v1.0 | gnl BGIA2 CA_chr10:88748841-88751202  | 136.31  | 39.1452 | -1.79999 | 0.00035  | 0.013577 |
| Cotton_A_07353_BGI-A2_v1.0 | gnl BGIA2 CA_chr11:7510593-7516935    | 27.431  | 181.735 | 2.72796  | 5.00E-05 | 0.004237 |
| Cotton_A_11474_BGI-A2_v1.0 | gnl BGIA2 CA_chr10:69456460-69458525  | 57.335  | 12.1962 | -2.23298 | 0.00045  | 0.015611 |
| Cotton_A_14230_BGI-A2_v1.0 | gnl BGIA2 CA_chr7:18009881-18019817   | 55.1628 | 5.48061 | -3.33129 | 5.00E-05 | 0.004237 |
| Cotton_A_14231_BGI-A2_v1.0 | gnl BGIA2 CA_chr7:18033096-18040726   | 23.2418 | 1.8219  | -3.6732  | 5.00E-05 | 0.004237 |
| Cotton_A_14232_BGI-A2_v1.0 | gnl BGIA2 CA_chr7:18046613-18054222   | 9.47296 | 1.60726 | -2.55921 | 0.00205  | 0.042988 |
| Cotton_A_15229_BGI-A2_v1.0 | gnl BGIA2 CA_chr1:128036614-128037463 | 71.8095 | 10.3863 | -2.78949 | 0.001    | 0.026106 |
| Cotton_A_15642_BGI-A2_v1.0 | gnl BGIA2 CA_chr4:137204947-137209185 | 41.2791 | 249.543 | 2.5958   | 0.0001   | 0.006735 |
| Cotton_A_16517_BGI-A2_v1.0 | gnl BGIA2 CA_chr11:16173771-16179808  | 41.6616 | 115.756 | 1.4743   | 0.0019   | 0.041007 |
| Cotton_A_16741_BGI-A2_v1.0 | gnl BGIA2 CA_chr2:60824477-60827881   | 18.0563 | 5.27256 | -1.77593 | 0.0017   | 0.037999 |
| Cotton_A_17344_BGI-A2_v1.0 | gnl BGIA2 CA_chr9:31296716-31297799   | 133.281 | 27.5267 | -2.27556 | 5.00E-05 | 0.004237 |
| Cotton_A_17498_BGI-A2_v1.0 | gnl BGIA2 CA_chr9:12130179-12142499   | 41.4669 | 9.68616 | -2.09796 | 5.00E-05 | 0.004237 |
| Cotton_A_18724_BGI-A2_v1.0 | gnl BGIA2 CA_chr1:27426797-27429215   | 21.6872 | 2.83861 | -2.93359 | 0.0006   | 0.018406 |
| Cotton_A_19047_BGI-A2_v1.0 | gnl BGIA2 CA_chr12:49705252-49707619  | 39.5819 | 4.10637 | -3.2689  | 5.00E-05 | 0.004237 |
| Cotton_A_19049_BGI-A2_v1.0 | gnl BGIA2 CA_chr12:49669667-49672284  | 72.8806 | 26.1084 | -1.48102 | 0.0017   | 0.037999 |
| Cotton_A_20472_BGI-A2_v1.0 | gnl BGIA2 CA_chr1:59147041-59150376   | 20.1794 | 4.4171  | -2.19172 | 0.0009   | 0.024389 |
| Cotton_A_20984_BGI-A2_v1.0 | gnl BGIA2 CA_chr8:63913024-63913447   | 11.3593 | 0       | _inf     | 0.002    | 0.042282 |
| Cotton_A_21151_BGI-A2_v1.0 | gnl BGIA2 CA_chr9:41272351-41275298   | 51.2317 | 15.2314 | -1.74998 | 0.0023   | 0.04608  |
| Cotton_A_21201_BGI-A2_v1.0 | gnl BGIA2 CA_chr3:59714615-59715828   | 209.042 | 59.8822 | -1.80359 | 0.00215  | 0.044057 |
| Cotton_A_22249_BGI-A2_v1.0 | gnl BGIA2 CA_chr8:26498011-26501174   | 34.6935 | 10.7718 | -1.68741 | 0.00135  | 0.032047 |
| Cotton_A_22570_BGI-A2_v1.0 | gnl BGIA2 CA_chr10:12316909-12320944  | 9.38004 | 92.9193 | 3.30831  | 5.00E-05 | 0.004237 |

|                            |                                        |         |         |          |          |          |
|----------------------------|----------------------------------------|---------|---------|----------|----------|----------|
| Cotton_A_23060_BGI-A2_v1.0 | gnl BGIA2 CA_chr9:77857506-77869160    | 38.1568 | 5.09921 | -2.90359 | 5.00E-05 | 0.004237 |
| Cotton_A_25556_BGI-A2_v1.0 | gnl BGIA2 CA_chr12:22027282-22029646   | 34.365  | 8.41093 | -2.0306  | 0.0003   | 0.012406 |
| Cotton_A_25849_BGI-A2_v1.0 | gnl BGIA2 CA_chr13:119412083-119415010 | 23.579  | 109.635 | 2.21713  | 0.0002   | 0.009799 |
| Cotton_A_29627_BGI-A2_v1.0 | gnl BGIA2 CA_chr9:43969287-43974380    | 17.4313 | 1.31218 | -3.73164 | 0.00235  | 0.046765 |
| Cotton_A_29772_BGI-A2_v1.0 | gnl BGIA2 CA_chr13:92047203-92047942   | 0       | 10.7962 | inf      | 0.00025  | 0.011261 |
| Cotton_A_29908_BGI-A2_v1.0 | gnl BGIA2 CA_chr2:86072084-86075976    | 23.0975 | 80.2823 | 1.79734  | 0.00055  | 0.017388 |
| Cotton_A_30881_BGI-A2_v1.0 | gnl BGIA2 CA_chr8:50885811-50888353    | 42.0303 | 6.59963 | -2.67097 | 0.002    | 0.042282 |
| Cotton_A_30882_BGI-A2_v1.0 | gnl BGIA2 CA_chr8:50895399-50897963    | 44.138  | 10.6881 | -2.04602 | 0.00225  | 0.045342 |
| Cotton_A_30892_BGI-A2_v1.0 | gnl BGIA2 CA_chr8:51192936-51193290    | 0       | 28.8302 | inf      | 0.0003   | 0.012406 |
| Cotton_A_32553_BGI-A2_v1.0 | gnl BGIA2 CA_chr4:42548129-42550968    | 53.0137 | 7.57963 | -2.80617 | 5.00E-05 | 0.004237 |
| Cotton_A_32557_BGI-A2_v1.0 | gnl BGIA2 CA_chr4:42570411-42571788    | 95.9118 | 16.5713 | -2.53302 | 5.00E-05 | 0.004237 |
| Cotton_A_33914_BGI-A2_v1.0 | gnl BGIA2 CA_chr1:11321262-11328543    | 20.8969 | 98.5848 | 2.23807  | 0.0003   | 0.012406 |
| Cotton_A_34190_BGI-A2_v1.0 | gnl BGIA2 CA_chr1:49831463-49833962    | 10.0313 | 0       | _inf     | 5.00E-05 | 0.004237 |
| Cotton_A_34636_BGI-A2_v1.0 | gnl BGIA2 CA_chr8:7839155-7841843      | 57.1537 | 314.214 | 2.45883  | 0.00105  | 0.026869 |
| Cotton_A_34917_BGI-A2_v1.0 | gnl BGIA2 CA_chr7:94571479-94573667    | 0       | 4.6606  | inf      | 5.00E-05 | 0.004237 |
| Cotton_A_36679_BGI-A2_v1.0 | gnl BGIA2 CA_chr11:99794309-99795041   | 6.29186 | 0       | _inf     | 0.0002   | 0.009799 |
| Cotton_A_37182_BGI-A2_v1.0 | gnl BGIA2 CA_chr1:77639537-77642261    | 37.8343 | 8.55246 | -2.14528 | 0.0003   | 0.012406 |
| Cotton_A_37667_BGI-A2_v1.0 | gnl BGIA2 CA_chr8:104888327-104890618  | 72.572  | 9.1965  | -2.98026 | 0.0001   | 0.006735 |
| Cotton_A_37763_BGI-A2_v1.0 | gnl BGIA2 CA_chr2:30869154-30881875    | 74.5785 | 7.94282 | -3.23104 | 5.00E-05 | 0.004237 |

## 295 **References**

- 296
- 297 Afzal, Z., Howton, T., Sun, Y., and Mukhtar, M.S. (2016). The roles of aquaporins in plant stress  
298 responses. *Journal of Developmental Biology* 4(1), 9.
- 299 Antony, G., Zhou, J., Huang, S., Li, T., Liu, B., White, F., et al. (2010). Rice xa13 recessive  
300 resistance to bacterial blight is defeated by induction of the disease susceptibility gene  
301 Os-11N3. *The Plant Cell* 22(11), 3864-3876.
- 302 Aritua, V., Achor, D., Gmitter, F.G., Albrigo, G., and Wang, N. (2013). Transcriptional and  
303 microscopic analyses of citrus stem and root responses to *Candidatus Liberibacter*  
304 *asiaticus* infection. *PloS one* 8(9), e73742.
- 305 Barakat, A., Szick-Miranda, K., Chang, F., Guyot, R., Blanc, G., Cooke, R., et al. (2001). The  
306 organization of cytoplasmic ribosomal protein genes in the Arabidopsis genome. *Plant*  
307 *Physiology* 127(2), 398-415.
- 308 Bogdanove, A.J. (2014). Principles and applications of TAL effectors for plant physiology and  
309 metabolism. *Current opinion in plant biology* 19, 99-104.
- 310 Bourdenx, B., Bernard, A., Domergue, F., Pascal, S., Léger, A., Roby, D., et al. (2011).  
311 Overexpression of Arabidopsis ECERIFERUM1 promotes wax very-long-chain alkane  
312 biosynthesis and influences plant response to biotic and abiotic stresses. *Plant physiology*  
313 156(1), 29-45.
- 314 Cerrudo, I., Keller, M.M., Cargnel, M.D., Demkura, P.V., de Wit, M., Patitucci, M.S., et al.  
315 (2012). Low red/far-red ratios reduce Arabidopsis resistance to *Botrytis cinerea* and  
316 jasmonate responses via a COI1-JAZ10-dependent, salicylic acid-independent  
317 mechanism. *Plant Physiology* 158(4), 2042-2052.
- 318 Chakraborty, S., and Newton, A.C. (2011). Climate change, plant diseases and food security: an  
319 overview. *Plant Pathology* 60(1), 2-14.
- 320 Chandran, D. (2015). Co-option of developmentally regulated plant SWEET transporters for  
321 pathogen nutrition and abiotic stress tolerance. *IUBMB life* 67(7), 461-471.
- 322 Chen, J.-Y., Huang, J.-Q., Li, N.-Y., Ma, X.-F., Wang, J.-L., Liu, C., et al. (2015). Genome-wide  
323 analysis of the gene families of resistance gene analogues in cotton and their response to  
324 *Verticillium* wilt. *BMC plant biology* 15(1), 148.
- 325 Chen, Z., Zhou, T., Wu, X., Hong, Y., Fan, Z., and Li, H. (2008). Influence of cytoplasmic heat  
326 shock protein 70 on viral infection of *Nicotiana benthamiana*. *Molecular plant pathology*  
327 9(6), 809-817.
- 328 Combier, J.-P., Vernié, T., de Billy, F., El Yahyaoui, F., Mathis, R., and Gamas, P. (2007). The  
329 MtMMPL1 early nodulin is a novel member of the matrix metalloendoproteinase family  
330 with a role in *Medicago truncatula* infection by *Sinorhizobium meliloti*. *Plant physiology*  
331 144(2), 703-716.
- 332 De Beer, A., and Vivier, M.A. (2011). Four plant defensins from an indigenous South African  
333 Brassicaceae species display divergent activities against two test pathogens despite high  
334 sequence similarity in the encoding genes. *BMC research notes* 4(1), 459.
- 335 De Vos, M., Denekamp, M., Dicke, M., Vuylsteke, M., Van Loon, L., Smeekens, S.C., et al.  
336 (2006). The Arabidopsis thaliana transcription factor AtMYB102 functions in defense  
337 against the insect herbivore *Pieris rapae*. *Plant signaling & behavior* 1(6), 305-311.

338 Di, R., and Tumer, N.E. (2005). Expression of a truncated form of ribosomal protein L3 confers  
339 resistance to pokeweed antiviral protein and the Fusarium mycotoxin deoxynivalenol.  
340 *Molecular plant-microbe interactions* 18(8), 762-770.

341 Eigenbrode, S.D., Rayor, L., Chow, J., and Latty, P. (2000). Effects of wax bloom variation in  
342 Brassica oleracea on foraging by a vespid wasp. *Entomologia Experimentalis et*  
343 *Applicata* 97(2), 161-166.

344 Fagard, M., Launay, A., Clément, G., Courtial, J., Dellagi, A., Farjad, M., et al. (2014). Nitrogen  
345 metabolism meets phytopathology. *Journal of experimental botany* 65(19), 5643-5656.

346 Feller, A., Machemer, K., Braun, E.L., and Grotewold, E. (2011). Evolutionary and comparative  
347 analysis of MYB and bHLH plant transcription factors. *The Plant Journal* 66(1), 94-116.

348 Figueiredo, A., Monteiro, F., and Sebastiana, M. (2014). Subtilisin-like proteases in plant-  
349 pathogen recognition and immune priming: a perspective. *Frontiers in plant science* 5,  
350 739.

351 Gong, Q., Yang, Z., Wang, X., Butt, H.I., Chen, E., He, S., et al. (2017). Salicylic acid-related  
352 cotton (*Gossypium arboreum*) ribosomal protein GaRPL18 contributes to resistance to  
353 *Verticillium dahliae*. *BMC Plant Biology* 17(1), 59.

354 Hartley, S.E., Fitt, R.N., McLarnon, E.L., and Wade, R.N. (2015). Defending the leaf surface:  
355 intra- and inter-specific differences in silicon deposition in grasses in response to damage  
356 and silicon supply. *Frontiers in plant science* 6.

357 Hofius, D., Maier, A.T., Dietrich, C., Jungkunz, I., Börnke, F., Maiss, E., et al. (2007). Capsid  
358 protein-mediated recruitment of host DnaJ-like proteins is required for Potato virus Y  
359 infection in tobacco plants. *Journal of virology* 81(21), 11870-11880.

360 Igarashi, D., Tsuda, K., and Katagiri, F. (2012). The peptide growth factor, phyto-sulfokine,  
361 attenuates pattern-triggered immunity. *The Plant Journal* 71(2), 194-204.

362 Kampinga, H.H., and Craig, E.A. (2010). The HSP70 chaperone machinery: J proteins as drivers  
363 of functional specificity. *Nature reviews Molecular cell biology* 11(8), 579-592.

364 Kanehisa, M., Furumichi, M., Tanabe, M., Sato, Y. and Morishima, K. (2017). KEGG: new  
365 perspectives on genomes, pathways, diseases and drugs. *Nucleic acids research*. 45  
366 D353-D361.

367 Katiyar, A., Smita, S., Lenka, S.K., Rajwanshi, R., Chinnusamy, V., and Bansal, K.C. (2012).  
368 Genome-wide classification and expression analysis of MYB transcription factor families  
369 in rice and Arabidopsis. *BMC genomics* 13(1), 544.

370 Kim, M.J., Kim, H.R., and Paek, K.-H. (2006). Arabidopsis tonoplast proteins TIP1 and TIP2  
371 interact with the cucumber mosaic virus 1a replication protein. *Journal of general*  
372 *virology* 87(11), 3425-3431.

373 Lacerda, A., Vasconcelos, É.A.R., Pelegrini, P.B., and Grossi-de-Sa, M.F. (2014). Antifungal  
374 defensins and their role in plant defense. *Frontiers in microbiology* 5, 116.

375 Lim, H.-S., Nam, J., Seo, E.-Y., Nam, M., Vaira, A.M., Bae, H., et al. (2014). The coat protein of  
376 *Alternanthera* mosaic virus is the elicitor of a temperature-sensitive systemic necrosis in  
377 *Nicotiana benthamiana*, and interacts with a host boron transporter protein. *Virology* 452,  
378 264-278.

379 Liu, H., Zhou, X., Dong, N., Liu, X., Zhang, H., and Zhang, Z. (2011a). Expression of a wheat  
380 MYB gene in transgenic tobacco enhances resistance to *Ralstonia solanacearum*, and to  
381 drought and salt stresses. *Functional & integrative genomics* 11(3), 431-443.

382 Liu, J.Z., and Whitham, S.A. (2013). Overexpression of a soybean nuclear localized type-III  
383 DnaJ domain-containing HSP40 reveals its roles in cell death and disease resistance. *The*  
384 *Plant Journal* 74(1), 110-121.

385 Liu, Q., Yuan, M., Zhou, Y., Li, X., Xiao, J., and Wang, S. (2011b). A paralog of the  
386 MtN3/saliva family recessively confers race-specific resistance to *Xanthomonas oryzae*  
387 in rice. *Plant, cell & environment* 34(11), 1958-1969.

388 Loivamäki, M., Stührwohldt, N., Deeken, R., Steffens, B., Roitsch, T., Hedrich, R., et al. (2010).  
389 A role for PSK signaling in wounding and microbial interactions in Arabidopsis.  
390 *Physiologia plantarum* 139(4), 348-357.

391 Maimbo, M., Ohnishi, K., Hikichi, Y., Yoshioka, H., and Kiba, A. (2007). Induction of a small  
392 heat shock protein and its functional roles in Nicotiana plants in the defense response  
393 against *Ralstonia solanacearum*. *Plant Physiology* 145(4), 1588-1599.

394 Mandadi, K.K., and Scholthof, K.-B.G. (2013). Plant immune responses against viruses: how  
395 does a virus cause disease? *The Plant Cell* 25(5), 1489-1505.

396 Marino, G., and Funk, C. (2012). Matrix metalloproteinases in plants: a brief overview.  
397 *Physiologia plantarum* 145(1), 196-202.

398 Matsumoto, T., Lian, H.-L., Su, W.-A., Tanaka, D., wei Liu, C., Iwasaki, I., et al. (2009). Role of  
399 the aquaporin PIP1 subfamily in the chilling tolerance of rice. *Plant and Cell Physiology*  
400 50(2), 216-229.

401 Meissner, M., Orsini, E., Ruschhaupt, M., Melchinger, A.E., Hinch, D.K., and Heyer, A.G.  
402 (2013). Mapping quantitative trait loci for freezing tolerance in a recombinant inbred line  
403 population of Arabidopsis thaliana accessions Tenela and C24 reveals REVEILLE1 as  
404 negative regulator of cold acclimation. *Plant, cell & environment* 36(7), 1256-1267.

405 Meng, D., Walsh, M., and Fricke, W. (2016). Rapid changes in root hydraulic conductivity and  
406 aquaporin expression in rice (*Oryza sativa* L.) in response to shoot removal—xylem  
407 tension as a possible signal. *Annals of Botany* 118(4), 809-819.

408 Modolo, L.V., Augusto, O., Almeida, I.M., Pinto-Maglio, C.A., Oliveira, H.C., Seligman, K., et  
409 al. (2006). Decreased arginine and nitrite levels in nitrate reductase-deficient Arabidopsis  
410 thaliana plants impair nitric oxide synthesis and the hypersensitive response to  
411 *Pseudomonas syringae*. *Plant Science* 171(1), 34-40.

412 Nagaraj, S., Senthil-Kumar, M., Ramu, V.S., Wang, K., and Mysore, K.S. (2016). Plant  
413 ribosomal proteins, RPL12 and RPL19, play a role in nonhost disease resistance against  
414 bacterial pathogens. *Frontiers in plant science* 6, 1192.

415 Opperman, C.H., Taylor, C.G., and Conkling, M.A. (1994). Root-knot nematode-directed  
416 expression of a plant root-specific gene. *Science-AAAS-Weekly Paper Edition-including*  
417 *Guide to Scientific Information* 263(5144), 221-223.

418 Park, C.-J., and Seo, Y.-S. (2015). Heat shock proteins: a review of the molecular chaperones for  
419 plant immunity. *The plant pathology journal* 31(4), 323.

420 Paungfoo-Lonhienne, C., Schmidt, S., and Lonhienne, T.G. (2010). Uptake of non-pathogenic *E.*  
421 *coli* by Arabidopsis induces down-regulation of heat shock proteins. *Plant signaling &*  
422 *behavior* 5(12), 1626-1628.

423 Rawat, R., Schwartz, J., Jones, M.A., Sairanen, I., Cheng, Y., Andersson, C.R., et al. (2009).  
424 REVEILLE1, a Myb-like transcription factor, integrates the circadian clock and auxin  
425 pathways. *Proceedings of the National Academy of Sciences* 106(39), 16883-16888.



426 Rogalski, M., Schöttler, M.A., Thiele, W., Schulze, W.X., and Bock, R. (2008). Rpl33, a  
427 nonessential plastid-encoded ribosomal protein in tobacco, is required under cold stress  
428 conditions. *The Plant Cell* 20(8), 2221-2237.

429 Saibo, N.J., Lourenço, T., and Oliveira, M.M. (2009). Transcription factors and regulation of  
430 photosynthetic and related metabolism under environmental stresses. *Annals of botany*  
431 103(4), 609-623.

432 Schiermeyer, A., Hartenstein, H., Mandal, M.K., Otte, B., Wahner, V., and Schillberg, S. (2009).  
433 A membrane-bound matrix-metalloproteinase from *Nicotiana tabacum* cv. BY-2 is  
434 induced by bacterial pathogens. *BMC plant biology* 9(1), 83.

435 Sekhwal, M.K., Li, P., Lam, I., Wang, X., Cloutier, S., and You, F.M. (2015). Disease resistance  
436 gene analogs (RGAs) in plants. *International journal of molecular sciences* 16(8), 19248-  
437 19290.

438 Soellick, T.-R., Uhrig, J., Bucher, G., Kellmann, J.-W., and Schreier, P. (2000). The movement  
439 protein NSm of tomato spotted wilt tospovirus (TSWV): RNA binding, interaction with  
440 the TSWV N protein, and identification of interacting plant proteins. *Proceedings of the*  
441 *National Academy of Sciences* 97(5), 2373-2378.

442 Song, J., Bradeen, J.M., Naess, S.K., Raasch, J.A., Wielgus, S.M., Haberlach, G.T., et al. (2003).  
443 Gene RB cloned from *Solanum bulbocastanum* confers broad spectrum resistance to  
444 potato late blight. *Proceedings of the National Academy of Sciences* 100(16), 9128-9133.

445 Stevenson, C.E., Burton, N., Costa, M.M., Nath, U., Dixon, R.A., Coen, E.S., et al. (2006).  
446 Crystal structure of the MYB domain of the RAD transcription factor from *Antirrhinum*  
447 *majus*. *Proteins: Structure, Function, and Bioinformatics* 65(4), 1041-1045.

448 Sun, W., Van Montagu, M., and Verbruggen, N. (2002). Small heat shock proteins and stress  
449 tolerance in plants. *Biochimica et Biophysica Acta (BBA)-Gene Structure and Expression*  
450 1577(1), 1-9.

451 Takano, J., Miwa, K., Yuan, L., von Wirén, N., and Fujiwara, T. (2005). Endocytosis and  
452 degradation of BOR1, a boron transporter of *Arabidopsis thaliana*, regulated by boron  
453 availability. *Proceedings of the National Academy of Sciences of the United States of*  
454 *America* 102(34), 12276-12281.

455 Takano, J., Noguchi, K., Yasumori, M., Kobayashi, M., Gajdos, Z., Miwa, K., et al. (2002).  
456 *Arabidopsis* boron transporter for xylem loading. *Nature* 420(6913), 337-340.

457 Thomma, B.P., Cammue, B.P., and Thevissen, K. (2002). Plant defensins. *Planta* 216(2), 193-  
458 202.

459 Thomma, B.P., Nürnberger, T., and Joosten, M.H. (2011). Of PAMPs and effectors: the blurred  
460 PTI-ETI dichotomy. *The plant cell* 23(1), 4-15.

461 Tian, S., Wang, X., Li, P., Wang, H., Ji, H., Xie, J., et al. (2016). Plant aquaporin AtPIP1; 4 links  
462 apoplastic H<sub>2</sub>O<sub>2</sub> induction to disease immunity pathways. *Plant physiology*, pp.  
463 01237.02015.

464 Van Der Vossen, E., Sikkema, A., Hekkert, B.t.L., Gros, J., Stevens, P., Muskens, M., et al.  
465 (2003). An ancient R gene from the wild potato species *Solanum bulbocastanum* confers  
466 broad-spectrum resistance to *Phytophthora infestans* in cultivated potato and tomato. *The*  
467 *Plant Journal* 36(6), 867-882.

468 Verchot, J. (2012). Cellular chaperones and folding enzymes are vital contributors to membrane  
469 bound replication and movement complexes during plant RNA virus infection. *Frontiers*  
470 *in plant science* 3, 275.

471 Wang, J., Hu, Z., Zhao, T., Yang, Y., Chen, T., Yang, M., et al. (2015a). Genome-wide analysis  
472 of bHLH transcription factor and involvement in the infection by yellow leaf curl virus in  
473 tomato (*Solanum lycopersicum*). *BMC genomics* 16(1), 39.

474 Wang, J., Li, H., Han, Z., Zhang, H., Wang, T., Lin, G., et al. (2015b). Allosteric receptor  
475 activation by the plant peptide hormone phytoalexin. *Nature* 525(7568), 265-268.

476 Wang, Y., Guo, H., Li, H., Zhang, H., and Miao, X. (2012). Identification of transcription factors  
477 potential related to brown planthopper resistance in rice via microarray expression  
478 profiling. *BMC genomics* 13(1), 687.

479 Wang, Y., and Wu, W.-H. (2010). Plant sensing and signaling in response to K<sup>+</sup>-deficiency.  
480 *Molecular plant* 3(2), 280-287.

481 Whitham, S.A., Quan, S., Chang, H.S., Cooper, B., Estes, B., Zhu, T., et al. (2003). Diverse  
482 RNA viruses elicit the expression of common sets of genes in susceptible *Arabidopsis*  
483 *thaliana* plants. *The Plant Journal* 33(2), 271-283.

484 Xia, Y. (2004). Proteases in pathogenesis and plant defence. *Cellular microbiology* 6(10), 905-  
485 913.

486 Yamamoto-Katou, A., Katou, S., Yoshioka, H., Doke, N., and Kawakita, K. (2006). Nitrate  
487 reductase is responsible for elicitor-induced nitric oxide production in *Nicotiana*  
488 *benthamiana*. *Plant and cell physiology* 47(6), 726-735.

489 Yuan, H., Chen, X., Zhu, L., and He, G. (2005). Identification of genes responsive to brown  
490 planthopper *Nilaparvata lugens* Stål (Homoptera: Delphacidae) feeding in rice. *Planta*  
491 221(1), 105-112.

492 Zhou, L., He, H., Liu, R., Han, Q., Shou, H., and Liu, B. (2014). Overexpression of GmAKT2  
493 potassium channel enhances resistance to soybean mosaic virus. *BMC plant biology*  
494 14(1), 154.

495 Zhou, X., Hao, Q., Liao, J.-m., Zhang, Q., and Lu, H. (2013). Ribosomal protein S14 unties the  
496 MDM2-p53 loop upon ribosomal stress. *Oncogene* 32(3), 388-396.

497 Zipfel, C. (2008). Pattern-recognition receptors in plant innate immunity. *Current opinion in*  
498 *immunology* 20(1), 10-16.

499 Zou, J., Rodriguez-Zas, S., Aldea, M., Li, M., Zhu, J., Gonzalez, D.O., et al. (2005). Expression  
500 profiling soybean response to *Pseudomonas syringae* reveals new defense-related genes  
501 and rapid HR-specific downregulation of photosynthesis. *Molecular Plant-Microbe*  
502 *Interactions* 18(11), 1161-1174.

503
